# Supplementary material for: Assembling molecular semiconductor composites for enhanced photocatalytic cyclohexene oxidation
Source: Royal Society of Chemistry journal article supplement (doi:10.1039/d4cc04194a), 2024-01-01
Supplement: d4cc04194a1.pdf [file d4cc04194a1.pdf]

## **Assembling Molecular Semiconductor Composite for Enhanced Photocatalytic**

### **Cyclohexene Oxidation**

Haiyan Yu,<sup>a</sup> Xueting Wang,<sup>a</sup> Tingting Kong,<sup>a</sup> Mei-Yan Gao<sup>\*b</sup> and Xiaofeng Cui<sup>\*a</sup>

- a. Anhui Engineering Research Center of Carbon Neutrality, The Key Laboratory of Functional Molecular Solids, Ministry of Education, College of Chemistry and Materials Science, Anhui Normal University, Wuhu 241002, Anhui, P. R. China.
- b. Department of Chemical Sciences, Bernal Institute, University of Limerick, Limerick V94 T9PX, Republic of Ireland.

## Experimental Procedures

### Materials.

All reagents and solvents were used as received without further purification. Formic acid (HCOOH,  $\geq 99\%$ ), Isopropanol (HO<sup>i</sup>Pr,  $\geq 99\%$ ), were purchased from Sinopharm Chemical Reagent Co. Ltd. Isopropyl titanate (Ti(O<sup>i</sup>Pr)<sub>4</sub>,  $\geq 99.9\%$ ), Phosphotungstic acid (PTA,  $\geq 99.9\%$ ) were purchased from Aladdin Reagent Inc.

### Synthesis of Ti<sub>12</sub>-oxo cluster.

Ti(O<sup>i</sup>Pr)<sub>4</sub> (3.68 mL, 12 mmol) and 0.4 mL of formic acid were mixed at room temperature. The resultant solution was sealed in a 25 mL vial and transferred to a preheated oven heated at 80 °C for about four days. After cooled to room temperature, colorless block crystals of Ti<sub>12</sub>-oxo cluster were obtained.

### Synthesis of Ti<sub>12</sub>PTA.

Isopropanol (5.5 mL) and phosphotungstic acid (0.16 g, 0.054 mmol) were mixed at room temperature; then Ti(O<sup>i</sup>Pr)<sub>4</sub> (0.92 mL, 3.0 mmol) was added. The resultant solution was sealed in a 25 mL vial and transferred to a preheated oven heated at 80 °C for about three days. After cooled to room temperature, colorless block crystals of Ti<sub>12</sub>PTA were obtained.

### Sample characterizations.

Powder X-ray diffraction (PXRD) patterns were recorded with a diffractometer (SmartLab 9kw) using Cu K $\alpha$  ( $k = 0.15406$  nm) radiation with a Nickel filter operating at 40 kV and 10 mA at a scanning rate of 20°·min<sup>-1</sup>. The scanning electron microscopy image of Ti<sub>12</sub>PTA was taken on a Hitachi-Technologies Corporation Regulus8100 scanning electron microscopy operated at 15 kV. High-resolution TEM (HRTEM) images were taken on a Talos F200S-G2 field-emission high-resolution transmission electron microscope operated at 200 kV. Prior to electron microscopy characterizations, a drop of the isopropanol suspension of particles was placed on a piece of carbon-coated copper grid and dried under ambient conditions. The size of Ti<sub>12</sub>PTA nanoclusters was measured from HRTEM images and the average particle diameter was calculated from the mean diameter frequency distribution with the formula:  $d = \frac{\sum n_i d_i}{\sum n_i}$ , where  $n_i$  is the number of particles with a particle diameter ( $d_i$ ) in a certain range. High-resolution HAADF-STEM images were taken on a Titan Cubed Themis G2300 Spherical aberration-corrected transmission electron microscope. X-ray photoelectron spectra (XPS) were collected on an Thermo ESCALab 250 X-ray photoelectron spectrometer, using monochromatized Al-K $\alpha$  X-ray as the excitation source. Fourier-transform infrared (FT-IR) spectroscopy was performed on a Bruker Invenio. In-situ diffuse reflectance infrared Fourier transform spectroscopy (DRIFTS) over Ti<sub>12</sub>PTA was performed by using a Bruker INVENIO S FT-IR spectrophotometer, equipped with an MCT detector cooled by liquid nitrogen and a commercial reaction chamber from Harrick Scientific. The sample was irradiated by the Xenon lamp through a quartz window, and the IR spectra were collected in situ through the MCT detector. Each spectrum was recorded by averaging 128 scans at a 4 cm<sup>-1</sup> spectral resolution.

### Photocatalytic oxidation of Cyclohexene.

Standards with given concentrations of all possible reactant and products, namely cyclohexene, cyclohexene oxide, 2-cyclohexene-1-ol, 2-cyclohexene-1-one, 1,2-cyclohexanediol and adipic acid were prepared. 10  $\mu$ L of 1,2-dichlorobenzene was added to the standard as the internal standard. Using the area ratio vs. the mol ratio of a compound and the standard, calibration curves of each compound were generated. Standards of 1-hexene and cis-cyclooctene epoxidations were prepared analogously.

For the measurement of photocatalytic cyclohexene oxidation, 2 mg catalysts were dispersed in 10 mL cyclohexene in a 50 mL quartz flask. Then the quartz flask was performed on multi-channel photochemical reaction system (Perfect Light, PCX-50C) with 10 W LED lamp as the light source.

The atmosphere of quartz flask was replaced with high-purity O<sub>2</sub> nine times to form an oxidation ambient. The reaction temperature was kept constant at 25°C by circulating condensate water. The power density of light source was measured to be 200 mW·cm<sup>-2</sup>. The oxidation products were evaluated on a GC-MS (TRACE 1300 and ISQ 7000, thermo-scientific).

### **Electrochemical measurements.**

Photocurrent was recorded with a CHI 660E electrochemical workstation via a conventional three-electrode system in 0.5 M sodium sulfate electrolyte. Working electrode was prepared as follows: 5 mg photocatalysts were dispersed in a mixed solution of 980 μL ethanol and 20 μL nafion dispersion solutions to generate a homogeneous slurry. This slurry was transferred and coated on ITO glass plates (1 cm × 2 cm), and then dried at room temperature. The platinum foil and Ag/AgCl electrode were used as the counter electrode and the reference electrode, respectively, in a 0.5 M Na<sub>2</sub>SO<sub>4</sub> aqueous solution. The initial potential was set to 0.5 V (vs. Ag/AgCl). To investigate the underlying contribution for the photocurrent, triethanolamine was used as an electron donor to construct an outer-sphere reaction system under the same test conditions.

The Mott-Schottky plots were measured over an alternating current (AC) frequency of 1000, 1500 and 3000 Hz. The electrode was immersed in the 0.5 M Na<sub>2</sub>SO<sub>4</sub> aqueous solution. Working electrode was prepared as follows: 5 mg photocatalysts were dispersed in a mixed solution of 980 μL ethanol and 20 μL nafion dispersion solutions to generate a homogeneous slurry. This slurry was transferred and coated on ITO glass plates (1 cm × 2 cm), and then dried at room temperature. Ag/AgCl and Pt sheet electrodes were used as reference electrode and counter electrode, respectively.

### **Detection of reactive species.**

The experiments for determining reactive species were conducted by adding different types of excess scavengers (10 mM) into the stock solution before light irradiation. AgNO<sub>3</sub> was employed for sacrificing electrons, β-carotene for singlet oxygen (<sup>1</sup>O<sub>2</sub>), benzoquinone for •O<sub>2</sub><sup>-</sup>, tert-butanol for •OH, sodium sulfide for holes. <sup>1</sup>O<sub>2</sub> was further confirmed with ESR spectroscopy by using 2,2,6,6-tetramethyl-4-piperidone hydrochloride to in situ trap the spin-reactive species. 5 mg catalysts were dispersed in 2.5 mL acetonitrile solution, and 500 μL 4-oxo-TMP was added.

### **Single crystal X-ray diffraction**

Single crystal X-ray diffraction data of Ti<sub>12</sub>PTA was collected on a Bruker Quest diffractometer equipped with a 1μS microfocus X-ray source Mo Kα, (λ = 0.71073 Å) and CMOS detector. APEX4 was used for collecting, indexing, integrating and scaling the data.<sup>S1</sup> Absorption corrections were performed by multi-scan method.<sup>S2</sup> Space groups were determined using XPREP<sup>S3</sup> as implemented in APEX4. All non-hydrogen atoms present in the frameworks were refined anisotropically. Hydrogen atoms were located at idealized positions from the molecular geometry and refined isotropically with thermal parameters based on the equivalent displacement parameters of their carriers. The SQUEEZE option of PLATON was used to eliminate the contribution of disordered guest molecules to the reflection intensities.<sup>S4</sup> Crystallographic data reported in this paper is summarized in Tables S1. These crystal structures have been deposited to the Cambridge Crystallographic Data Centre.

**Table. S1** Crystallographic data and refinement parameters of Ti<sub>12</sub>PTA.

|                                          | Ti <sub>12</sub> TPA                                                                                                                                                  |
|------------------------------------------|-----------------------------------------------------------------------------------------------------------------------------------------------------------------------|
| CCDC Number                              | 2377155                                                                                                                                                               |
| Empirical formula                        | C <sub>99</sub> H <sub>231</sub> O <sub>104</sub> PTi <sub>24</sub> W <sub>12</sub> 1.4[C <sub>3</sub> H <sub>8</sub> O] 2[H <sub>2</sub> O]<br>1.6[H <sub>2</sub> O] |
| Formula weight                           | 6621.58                                                                                                                                                               |
| Temperature/K                            | 293(2)                                                                                                                                                                |
| Crystal system                           | monoclinic                                                                                                                                                            |
| Space group                              | <i>P2<sub>1</sub>/n</i>                                                                                                                                               |
| a/Å                                      | 15.7675(4)                                                                                                                                                            |
| b/Å                                      | 29.1952(7)                                                                                                                                                            |
| c/Å                                      | 44.3515(14)                                                                                                                                                           |
| α/°                                      | 90                                                                                                                                                                    |
| β/°                                      | 91.927(2)                                                                                                                                                             |
| γ/°                                      | 90                                                                                                                                                                    |
| Volume/Å <sup>3</sup>                    | 20405.0(10)                                                                                                                                                           |
| Z                                        | 4                                                                                                                                                                     |
| ρ <sub>calc</sub> /cm <sup>3</sup>       | 2.155                                                                                                                                                                 |
| μ/mm <sup>-1</sup>                       | 7.707                                                                                                                                                                 |
| Radiation                                | Mo Kα (λ = 0.71073)                                                                                                                                                   |
| Reflections collected                    | 68433                                                                                                                                                                 |
| Independent reflections                  | 21885                                                                                                                                                                 |
| Goodness-of-fit on F <sup>2</sup>        | 1.055                                                                                                                                                                 |
| R <sub>1</sub> [I>2σ(I)] <sup>[a]</sup>  | 0.0939                                                                                                                                                                |
| wR <sub>2</sub> [I>2σ(I)] <sup>[b]</sup> | 0.2739                                                                                                                                                                |

$$^{[a]}R_1 = \frac{\sum ||F_o| - |F_c||}{\sum |F_o|}, \quad ^{[b]}wR_2 = \left\{ \frac{\sum [w(F_o^2 - F_c^2)^2]}{\sum [w(F_o^2)^2]} \right\}^{1/2}.$$

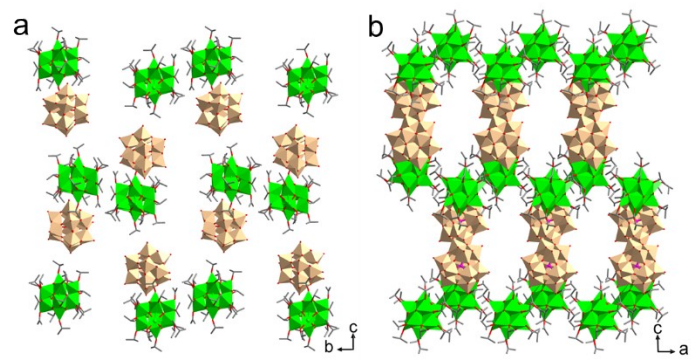

**Fig. S1** Packing structure of Ti<sub>12</sub>PTA viewed along a and b axis. H atoms are removed for clarity.

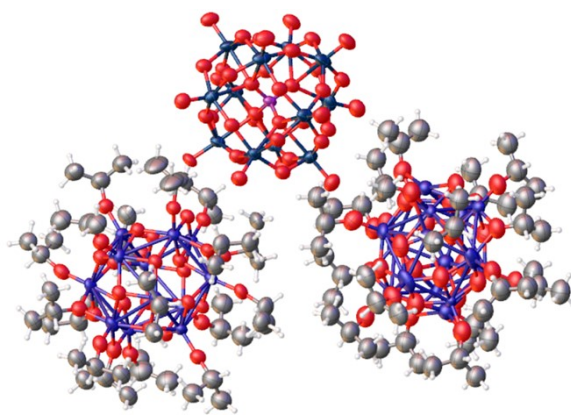

**Fig. S2** ORTEP drawings of Ti<sub>12</sub>PTA at the 50% probability level.

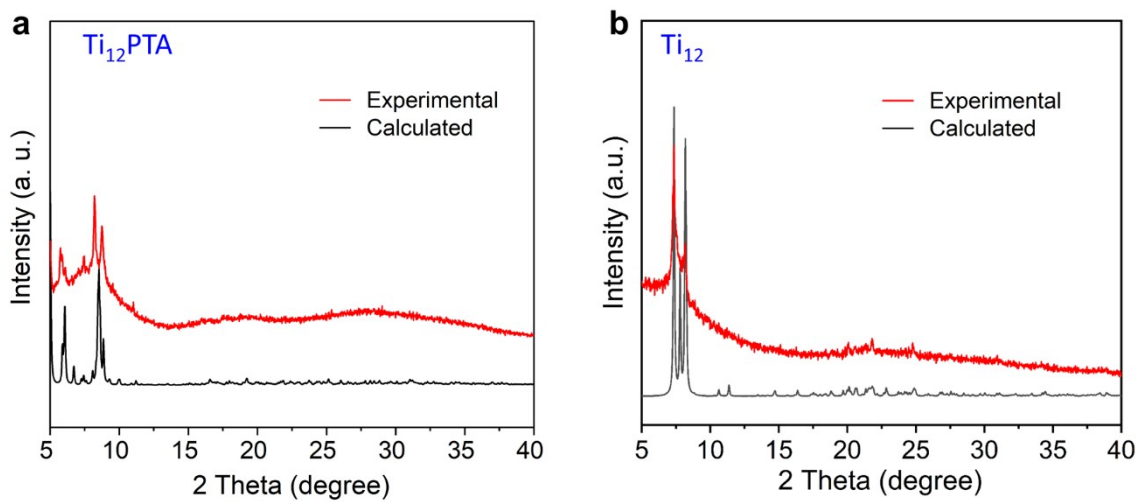

**Fig. S3** PXRD patterns of (a) cocrystal  $Ti_{12}PTA$  and (b) pure  $Ti_{12}$ -oxo cluster.

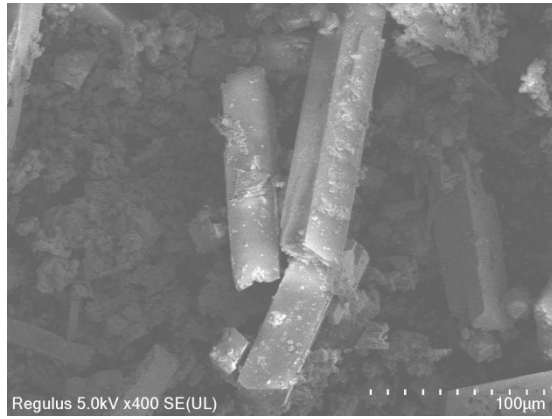

**Fig. S4** The scanning electron microscopy image of Ti<sub>12</sub>PTA.



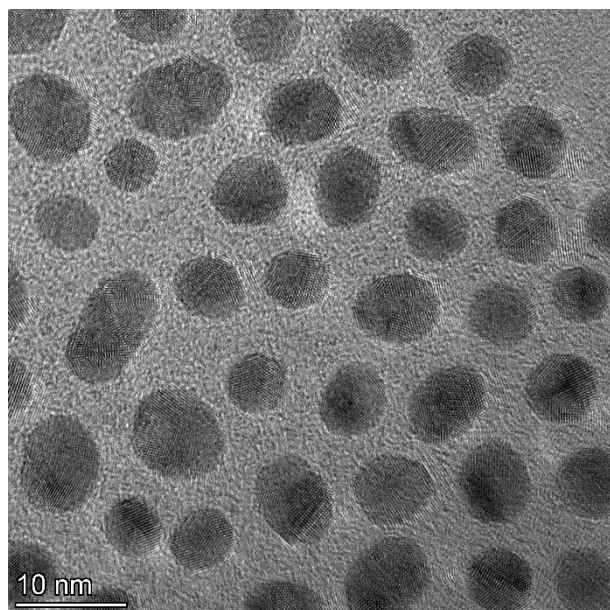

**Fig. S5** The transmission electron microscopy image of Ti<sub>12</sub>PTA.

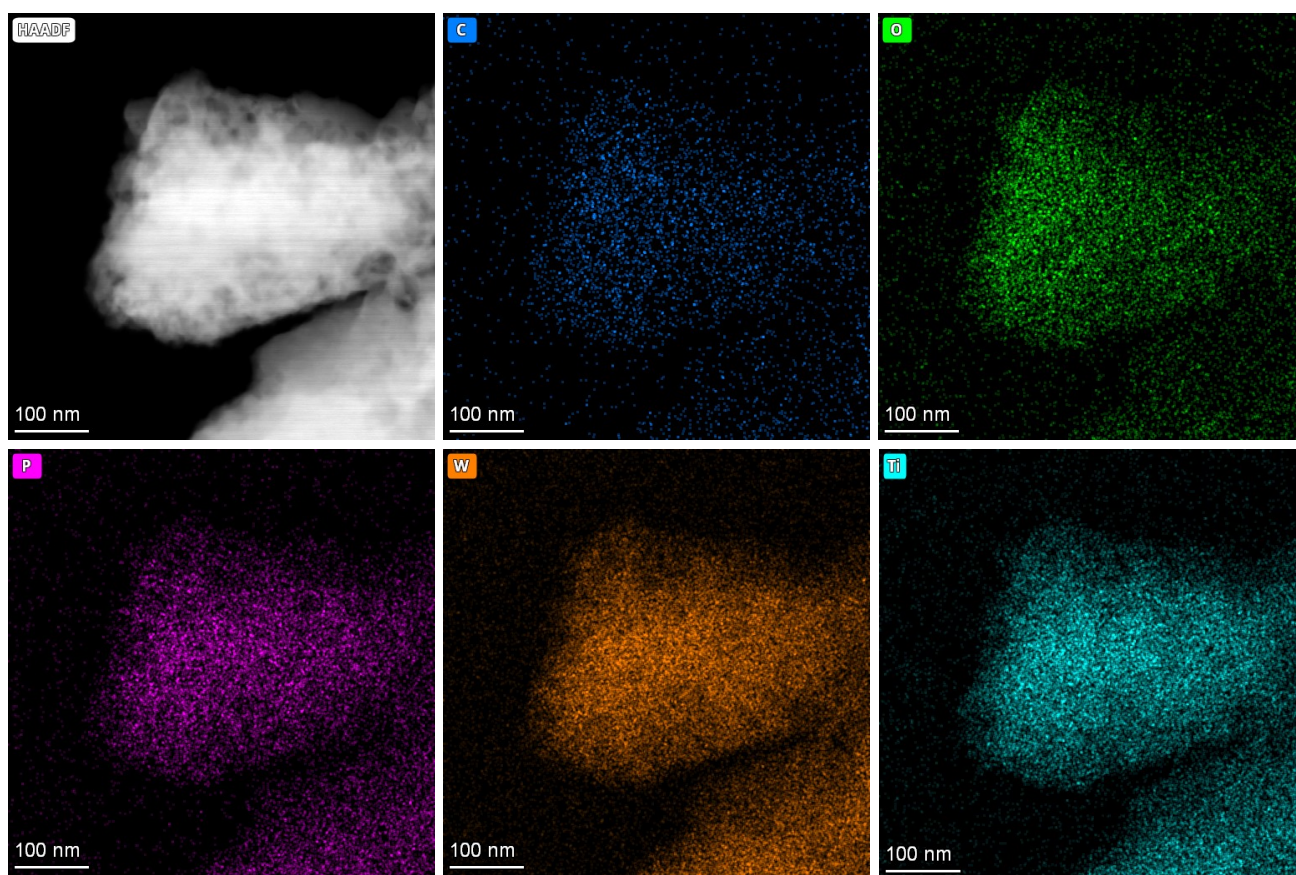

Fig. S6 STEM image and corresponding EDS elemental mapping images of Ti<sub>12</sub>PTA.

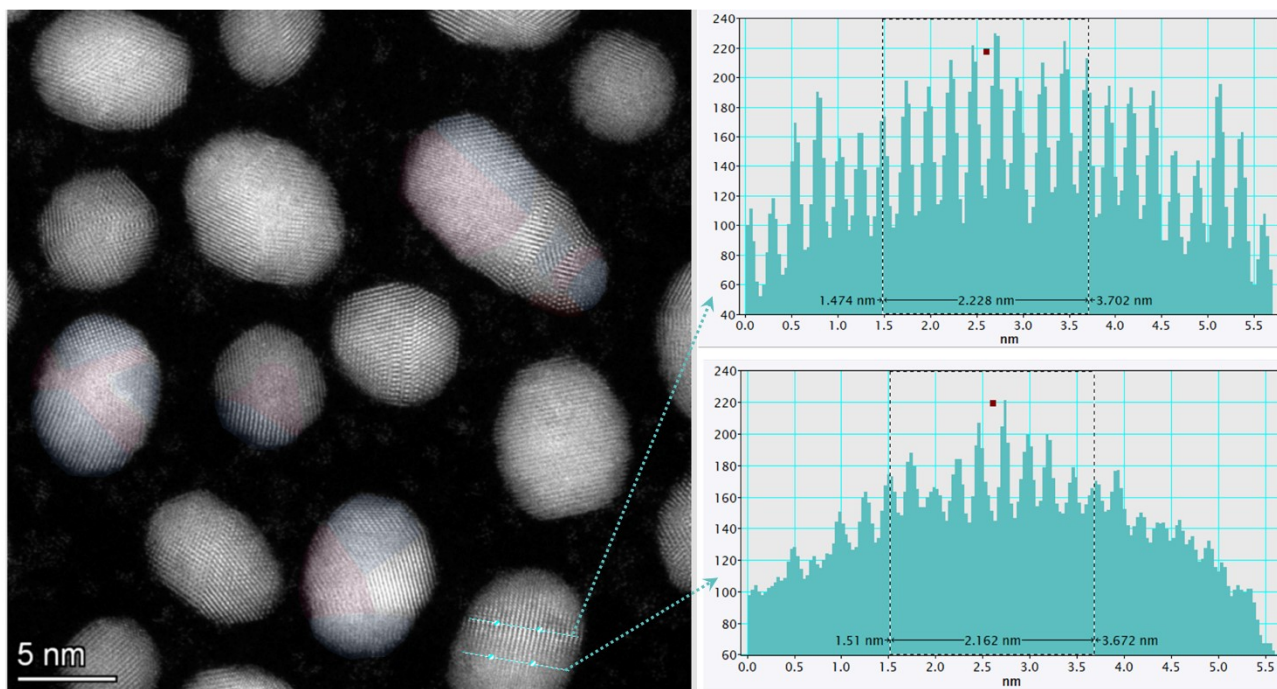

**Fig. S7** High-resolution HAADF-STEM and corresponding live profile for lattice spacing at different positions of one nanoparticle on the same crystal axis.

As can be seen in the Fig. S7 that the lattice space is different at different positions of one nanoparticle on the same crystal axis, which intuitively presents the molecular heterojunction in the cocrystal system.

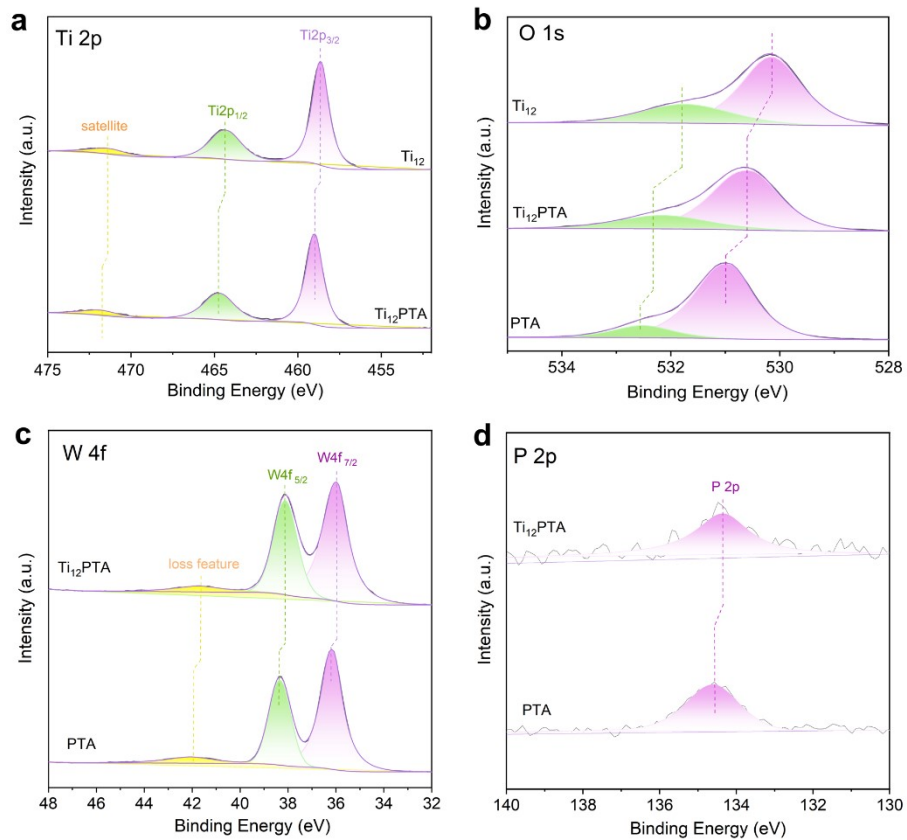

**Fig. S8** High-resolution XPS spectra of (a) Ti2p in pure  $Ti_{12}$ -oxo cluster and cocrystal  $Ti_{12}PTA$ , (b) O1s in  $Ti_{12}$  cluster, PTA and cocrystal  $Ti_{12}PTA$ , (c) W4f in PTA and cocrystal  $Ti_{12}PTA$ , (d) P2p in PTA and cocrystal  $Ti_{12}PTA$ .

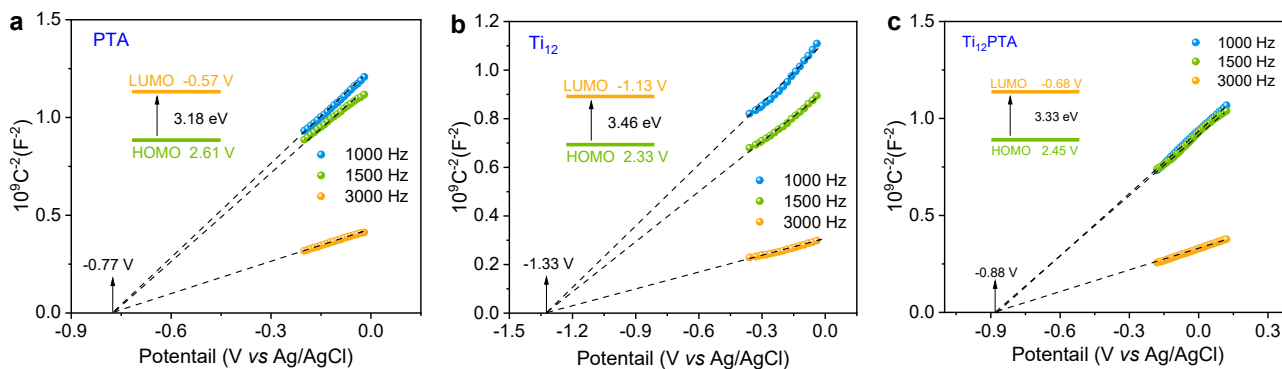

**Fig. S9** Mott-Schottky plots of (a) PTA  $\text{Ti}_{12}$ , (b)  $\text{Ti}_{12}$  and (c)  $\text{Ti}_{12}\text{PTA}$  electrodes measured in  $\text{Na}_2\text{SO}_4$  solution (0.5 M, pH ca. 7.0) at 1000 Hz, 1500 Hz and 3000 Hz.

As shown in Fig. S9, the positive slope of the obtained  $C^{-2}$  values (vs. the applied potentials) for the three clusters is consistent with that of the typical n-type semiconductors. As the intersection point is independent on the frequency, the Mott–Schottky measurements were conducted at three different frequencies (1000, 1500 and 3000 Hz) to reduce the errors. The flat band positions ( $V_{fb}$ ) for PTA,  $\text{Ti}_{12}$  and  $\text{Ti}_{12}\text{PTA}$  are determined from the intersection point to be approximately -0.77 V, -1.33 V and -0.88 V vs. Ag/AgCl, respectively, which can be calculated from the Nernst equation to be -0.57 V, -1.13 V and -0.68 V vs. NHE, respectively, according to. Since it is generally accepted that the bottom of the conduction band in n-type semiconductors is very close to the flat-band potential,<sup>55,56</sup> the LUMO of PTA,  $\text{Ti}_{12}$  and  $\text{Ti}_{12}\text{PTA}$  is estimated to be -0.57 V, -1.13 V and -0.68 V vs. NHE, respectively. Combined with the bandgap energy ( $E_g$ ) estimated from the Tauc plot (Fig. 2a), their HOMO levels are then calculated to be 2.33 V and 2.61 V vs. NHE, respectively. Their order and relative position agree well with the results obtained from the XPS valence band spectra (Fig. 2b), confirming the reliability of the determined energy levels.

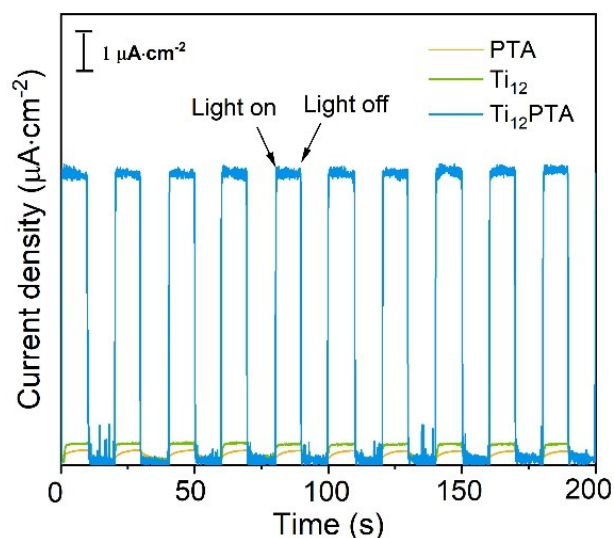

**Fig. S10** Photocurrents of  $\text{Ti}_{12}$ , PTA and  $\text{Ti}_{12}\text{PTA}$  in 0.5 M  $\text{Na}_2\text{SO}_4$  solution with triethanolamine as an electron donor under full spectrum irradiation.

To further investigate the charge transfer dynamics, we performed the photocurrent measurement on an outer-sphere system by adding triethanolamine to the electrolyte as an electron donor. Other test conditions are the same as for the inner-sphere reaction (Fig. 2d). As shown in the Fig. S10, the photocurrent of  $\text{Ti}_{12}\text{PTA}$  was 17.95 times enhanced from  $0.44 \mu\text{A}\cdot\text{cm}^{-1}$  to  $7.91 \mu\text{A}\cdot\text{cm}^{-1}$  compared to that in pure  $\text{Na}_2\text{SO}_4$  solution after the addition of electron donor. While the individual  $\text{Ti}_{12}$  and PTA only enhanced by 1.82 and 2.1 times, respectively. The photocurrent of  $\text{Ti}_{12}\text{PTA}$  is 13.64 times and 18.83 times higher than that of  $\text{Ti}_{12}$  and PTA respectively, in the outer-sphere system, confirming its more efficient photogenerated charge separation than the individual  $\text{Ti}_{12}$  and PTA.

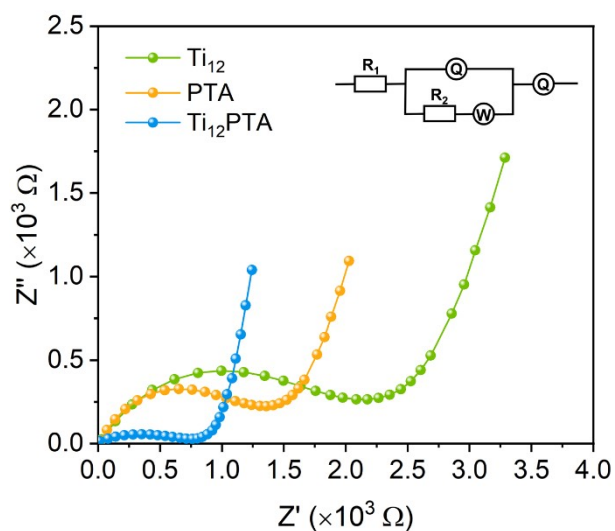

**Fig. S11** Nyquist plots of  $Ti_{12}PTA$ ,  $Ti_{12}$  and PTA. The inset in it is the equivalent circuit for fitting.  $Q$  and  $W$  in the equivalent circuit represent constant phase element and Warburg element, respectively.

To further confirm the superiority of  $Ti_{12}PTA$  in charge transfer and separation compared to individual PTA and  $Ti_{12}$ , we performed electrochemical impedance spectroscopy analyzes. As displayed in Fig. S11, the charge transfer resistance  $R_1$  drops sharply from 2175.76  $\Omega$  for  $Ti_{12}$  to 1305.92  $\Omega$  for PTA and 711.64  $\Omega$  for  $Ti_{12}PTA$ , manifesting the lowest internal resistance of  $Ti_{12}PTA$  for its efficient charge transfer.

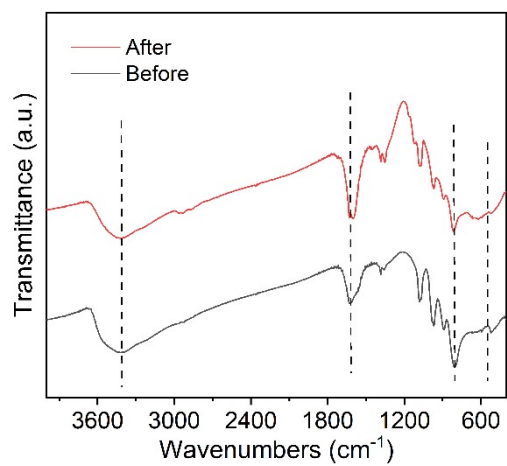

**Fig. S12** FT-IR spectra of Ti<sub>12</sub>PTA before and after durability test.



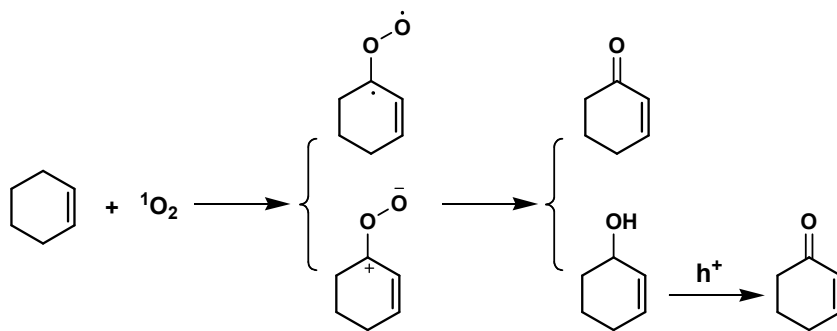

**Fig. S13** Proposed mechanism for the  $^1\text{O}_2$  oxidation of cyclohexene to 2-cyclohexene-1-one and 2-cyclohexene-1-ol.

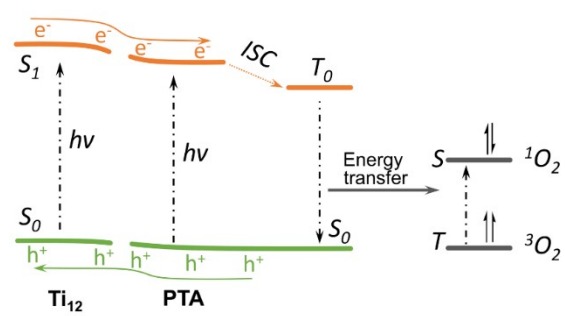

**Fig. S14** Schematic illustration of the proposed mechanism for  $^1O_2$  production.  $S$  denotes a singlet state,  $T$  denotes a triplet state, and ISC is abbreviation of intersystem crossing process.

| Photocatalysts                                                                   | Reaction solution                                                        | Light source         | Total Yield (mmol·g <sup>-1</sup> ·h <sup>-1</sup> ) | Durability | Reference                                                                    |
|----------------------------------------------------------------------------------|--------------------------------------------------------------------------|----------------------|------------------------------------------------------|------------|------------------------------------------------------------------------------|
| Ti <sub>12</sub> PTA                                                             | Pure cyclohexene<br>+O <sub>2</sub>                                      | ≥420 nm              | 144.0372                                             | 32 h       | <b>This work</b>                                                             |
| [UO <sub>2</sub> (OPCyPh <sub>2</sub> ) <sub>4</sub> ]Cl<br>O <sub>4</sub> ·EtOH | Acetonitrile<br>+cyclohexene<br>+O <sub>2</sub>                          | Blue light 436<br>nm | 73.8095                                              | —          | <i>Acs. Omega.</i><br>2019, <b>4</b> ,<br>7194–7199.                         |
| Ti <sub>60</sub> Zr <sub>10</sub> Co <sub>30</sub>                               | Acetone<br>+cyclohexene<br>+O <sub>2</sub> (100°C)                       | ≥420 nm              | 17.4238                                              | —          | <i>Catalysts.</i><br>2016, <b>6</b> , 24.                                    |
| LaCoO <sub>3</sub> -1000°C                                                       | Acetonitrile +cyclohexene<br>+10 bar O <sub>2</sub> (80°C)               | ≥420 nm              | 43.75                                                | —          | <i>J. Phys. Chem.</i><br><i>C.</i> 2023, <b>127</b> ,<br>5029–5038.          |
| MNC-10                                                                           | Acetone+<br>triphenylphosphine<br>+cyclohexene<br>+O <sub>2</sub> (75°C) | ≥420 nm              | 7.03                                                 | 18 h       | <i>ACS. Appl.</i><br><i>Nano. Mater.</i><br>2022, <b>5</b> ,<br>11723–11730. |

**Table S2** The performance comparison of our work with the photocatalysts for cyclohexene oxidation.

**Table. S2** Bond valence sum (BVS) analysis<sup>[c]</sup> for Ti<sub>12</sub>PTA.

|                            |                           |                            |
|----------------------------|---------------------------|----------------------------|
| W1 6.358                   | P1 5.284                  | Ti13 4.469                 |
| W1-O27 1.724 d=1.7195(10)  | P1-O7 1.379 d=1.485(14)   | Ti13-O67 1.235 d=1.713(18) |
| W1-O1 1.142 d=1.872(10)    | P1-O80 1.354 d=1.492(15)  | Ti13-O51 0.937 d=1.815(16) |
| W1-O78 1.096 d=1.887(8)    | P1-O86 1.300 d=1.507(16)  | Ti13-O99 0.853 d=1.85(2)   |
| W1-O8 1.076 d=1.894(9)     | P1-O20 1.251 d=1.521(15)  | Ti13-O103 0.739 d=1.903(9) |
| W1-O40 1.041 d=1.906(14)   |                           | Ti13-O101 0.706 d=1.92(2)  |
| W1-O7 0.279 d=2.393(14)    |                           |                            |
| <hr/>                      |                           |                            |
| W4 6.430                   | Ti1 4.251                 | Ti7 4.380                  |
| W4-O46 1.726 d=1.7191(10)  | Ti1-O48 1.199 d=1.724(15) | Ti7-O47 1.245 d=1.710(16)  |
| W4-O14 1.139 d=1.873(13)   | Ti1-O28 0.667 d=1.941(15) | Ti7-O37 0.853 d=1.85(2)    |
| W4-O1 1.111 d=1.882(8)     | Ti1-O54 0.611 d=1.973(16) | Ti7-O21 0.812 d=1.868(19)  |
| W4-O38 1.087 d=1.890(8)    | Ti1-O64 0.600 d=1.980(14) | Ti7-O95 0.550 d=2.012(18)  |
| W4-O6 1.084 d=1.891(9)     | Ti1-O70 0.590 d=1.986(15) | Ti7-O97 0.474 d=2.067(19)  |
| W4-O20 0.283 d=2.388(14)   | Ti1-O10 0.584 d=1.990(14) | Ti7-O11 0.446 d=2.09(2)    |
| <hr/>                      |                           |                            |
| W6 6.466                   | Ti4 4.410                 | Ti15 4.192                 |
| W6-O43 1.725 d=1.7193(10)  | Ti4-O76 1.151 d=1.739(9)  | Ti15-O23 0.953 d=1.809(19) |
| W6-O58 1.212 d=1.850(15)   | Ti4-O22 0.757 d=1.894(13) | Ti15-O83 0.823 d=1.863(19) |
| W6-O4 1.157 d=1.867(10)    | Ti4-O28 0.669 d=1.940(15) | Ti15-O93 0.765 d=1.89(2)   |
| W6-O38 1.090 d=1.889(13)   | Ti4-O54 0.642 d=1.955(15) | Ti15-O41 0.615 d=1.971(9)  |
| W6-O66 1.008 d=1.918(16)   | Ti4-O32 0.598 d=1.981(15) | Ti15-O5 0.553 d=2.01(2)    |
| W6-O20 0.274 d=2.400(14)   | Ti4-O18 0.594 d=1.984(14) | Ti15-O101 0.483 d=2.06(2)  |
| <hr/>                      |                           |                            |
| W8 6.406                   | Ti6 4.396                 | Ti2 4.365                  |
| W8-O98 1.724 d=1.7195(10)  | Ti6-O62 1.142 d=1.742(8)  | Ti2-O9 1.332 d=1.685(18)   |
| W8-O8 1.129 d=1.876(10)    | Ti6-O22 0.812 d=1.868(14) | Ti2-O63 0.786 d=1.88(2)    |
| W8-O68 1.111 d=1.882(9)    | Ti6-O34 0.651 d=1.950(15) | Ti2-O95 0.745 d=1.90(2)    |
| W8-O6 1.105 d=1.884(10)    | Ti6-O64 0.656 d=1.947(15) | Ti2-O65 0.616 d=1.97(2)    |
| W8-O36 1.050 d=1.903(14)   | Ti6-O28 0.623 d=1.966(14) | Ti2-O21 0.570 d=1.999(19)  |
| W8-O86 0.287 d=2.383(15)   | Ti6-O16 0.513 d=2.038(15) | Ti2-O49 0.315 d=2.218(18)  |
| <hr/>                      |                           |                            |
| W10 6.441                  | Ti8 4.205                 | Ti17 4.393                 |
| W10-O45 1.724 d=1.7195(10) | Ti8-O13 1.265 d=1.704(17) | Ti17-O99 0.976 d=1.80(2)   |
| W10-O56 1.154 d=1.868(15)  | Ti8-O10 0.823 d=1.863(15) | Ti17-O39 0.960 d=1.806(9)  |
| W10-O74 1.139 d=1.873(16)  | Ti8-O18 0.817 d=1.866(15) | Ti17-O63 0.950 d=1.81(2)   |
| W10-O40 1.087 d=1.890(14)  | Ti8-O26 0.660 d=1.945(15) | Ti17-O5 0.907 d=1.827(9)   |
| W10-O102 1.087 d=1.890(9)  | Ti8-O24 0.640 d=1.956(16) | Ti17-O101 0.600 d=1.98(2)  |
| W10-O7 0.249 d=2.435(14)   |                           |                            |
| <hr/>                      |                           |                            |

|                            |                             |                             |
|----------------------------|-----------------------------|-----------------------------|
| W12 6.303                  | Ti10 4.324                  | Ti19 4.215                  |
| W12-O15 1.723 d=1.7196(10) | Ti10-O35 1.452 d=1.653(16)  | Ti19-O81 1.332 d=1.685(19)  |
| W12-O78 1.102 d=1.885(8)   | Ti10-O72 0.817 d=1.866(15)  | Ti19-O51 0.925 d=1.82(2)    |
| W12-O12 1.093 d=1.888(8)   | Ti10-O26 0.747 d=1.899(15)  | Ti19-O103 0.723 d=1.911(9)  |
| W12-O96 1.079 d=1.893(9)   | Ti10-O32 0.685 d=1.931(15)  | Ti19-O11 0.725 d=1.91(2)    |
| W12-O74 1.053 d=1.902(15)  | Ti10-O18 0.623 d=1.966(15)  | Ti19-O88 0.510 d=2.04(2)    |
| W12-O7 0.253 d=2.430(15)   |                             |                             |
| W3 6.463                   | Ti12 4.114                  | Ti21 4.328                  |
| W3-O89 1.724 d=1.7195(10)  | Ti12-O55 1.208 d=1.721(15)  | Ti21-O11 1.279 d=1.70(2)    |
| W3-O30 1.212 d=1.850(10)   | Ti12-O24 0.825 d=1.862(15)  | Ti21-O75 1.218 d=1.718(17)  |
| W3-O44 1.099 d=1.886(8)    | Ti12-O82 0.729 d=1.908(16)  | Ti21-O88 0.976 d=1.80(2)    |
| W3-O36 1.093 d=1.888(16)   | Ti12-O10 0.683 d=1.932(15)  | Ti21-O97 0.633 d=1.96(2)    |
| W3-O4 1.076 d=1.894(8)     | Ti12-O70 0.669 d=1.940(14)  | Ti21-O25 0.222 d=2.348(9)   |
| W3-O86 0.260 d=2.420(14)   |                             |                             |
| W7 6.430                   | Ti14 4.130                  | Ti11 4.463                  |
| W7-O61 1.723 d=1.7196(10)  | Ti14-O69 0.997 d=1.792(9)   | Ti11-O3 0.900 d=1.8298(10)  |
| W7-O12 1.154 d=1.868(10)   | Ti14-O16 0.971 d=1.802(9)   | Ti11-O83 0.855 d=1.849(9)   |
| W7-O104 1.108 d=1.883(11)  | Ti14-O50 0.839 d=1.856(15)  | Ti11-O25 0.711 d=1.917(9)   |
| W7-O66 1.096 d=1.887(14)   | Ti14-O60 0.711 d=1.917(15)  | Ti11-O71 0.709 d=1.918(9)   |
| W7-O14 1.084 d=1.891(9)    | Ti14-O34 0.611 d=1.973(15)  | Ti11-O93 0.669 d=1.94(2)    |
| W7-O20 0.264 d=2.414(15)   |                             | Ti11-O85 0.618 d=1.969(9)   |
| W2 6.496                   | Ti16 4.068                  | Ti23 4.183                  |
| W2-O73 1.723 d=1.7197(10)  | Ti16-O31 1.279 d=1.700(14)  | Ti23-O19 0.925 d=1.8198(10) |
| W2-O52 1.231 d=1.844(17)   | Ti16-O32 0.784 d=1.881(15)  | Ti23-O51 0.853 d=1.8498(10) |
| W2-O68 1.135 d=1.874(14)   | Ti16-O16 0.743 d=1.901(15)  | Ti23-O83 0.830 d=1.8599(10) |
| W2-O44 1.076 d=1.894(12)   | Ti16-O72 0.652 d=1.949(15)  | Ti23-O88 0.706 d=1.92(2)    |
| W2-O56 1.058 d=1.900(14)   | Ti16-O50 0.610 d=1.974(16)  | Ti23-O41 0.616 d=1.9703(10) |
| W2-O86 0.273 d=2.402(15)   |                             | Ti23-O85 0.253 d=2.2998(10) |
| W9 6.240                   | Ti18 4.238                  | Ti24 4.366                  |
| W9-O17 1.724 d=1.7195(10)  | Ti18-O90 1.070 d=1.766(17)  | Ti24-O53 1.199 d=1.724(9)   |
| W9-O2 1.096 d=1.887(17)    | Ti18-O94 0.698 d=1.924(17)  | Ti24-O92 0.669 d=1.940(16)  |
| W9-O30 1.070 d=1.896(9)    | Ti18-O42 0.665 d=1.942(16)  | Ti24-O42 0.651 d=1.950(15)  |
| W9-O84 1.067 d=1.897(13)   | Ti18-O60 0.610 d=1.974(15)  | Ti24-O26 0.635 d=1.959(16)  |
| W9-O58 1.014 d=1.916(15)   | Ti18-O82 0.607 d=1.976(16)  | Ti24-O24 0.611 d=1.973(15)  |
| W9-O80 0.269 d=2.407(14)   | Ti18-O100 0.589 d=1.987(17) | Ti24-O94 0.602 d=1.979(18)  |

|                            |                             |                           |
|----------------------------|-----------------------------|---------------------------|
| W5 6.372                   | Ti22 4.202                  | Ti3 4.291                 |
| W5-O33 1.724 d=1.7195(10)  | Ti22-O57 1.258 d=1.706(16)  | Ti3-O59 1.286 d=1.698(16) |
| W5-O91 1.186 d=1.858(18)   | Ti22-O92 0.605 d=1.977(17)  | Ti3-O65 1.030 d=1.78(2)   |
| W5-O102 1.120 d=1.879(10)  | Ti22-O42 0.590 d=1.986(15)  | Ti3-O97 0.853 d=1.85(2)   |
| W5-O84 1.093 d=1.888(9)    | Ti22-O72 0.587 d=1.988(16)  | Ti3-O25 0.584 d=1.990(9)  |
| W5-O52 1.000 d=1.921(17)   | Ti22-O100 0.586 d=1.989(18) | Ti3-O71 0.539 d=2.02(2)   |
| W5-O80 0.249 d=2.435(15)   | Ti22-O50 0.576 d=1.995(15)  |                           |
| <hr/>                      |                             |                           |
| W11 6.194                  |                             |                           |
| W11-O87 1.723 d=1.7196(10) |                             |                           |
| W11-O96 1.123 d=1.878(11)  |                             |                           |
| W11-O104 1.087 d=1.890(9)  |                             |                           |
| W11-O91 1.025 d=1.912(16)  |                             |                           |
| W11-O2 0.973 d=1.931(16)   |                             |                           |
| W11-O80 0.262 d=2.416(16)  |                             |                           |

$\nu_i = \sum S_{ij} = \sum \exp[(r_1 - r_{ij})/B]$ , where  $r_0$  is the length of a single bond (here  $r_1 = 1.921$  for W -O;  $1.604$  for P -O ;  $1.791$  for Ti -O ),  $r_1$  is the bond length between atoms  $i$  and  $j$ ;  $B$  is a constant, the “universal parameter”  $\sim 0.37 \text{ \AA}$ ;  $S_{ij}$  is the valence of a bond between atoms  $i$  and  $j$ ;  $\nu_i$  is the sum of all bond valences of the bonds formed by a given atom.<sup>57</sup>

## References

- S1 A. Bondi, *J. Phys. Chem.* 1964, **68**, 441–451.
- S2 L. Krause, R. Herbst-Irmer and G. M. Sheldrick, *J. Appl. Crystallogr.* 2015, **48**, 3–10.
- S3 R. E. Gannon, V. J. Krukonis and T. Schoenberg, *Product R&D.* 1970, **9**, 343–347.
- S4 A. Spek, *J. Appl. Crystallogr.*, 2003, **36**, 7–13.
- S5 Z. Z. Zhang, J.L. Long, L.F. Yang, W.K. Chen, W.X. Dai, X.Z. Fu and X.X. Wang, *Chem. Sci.* 2011, **2**, 1826–1830.
- S6 K. Maeda, K. Sekizawa and O. Ishitani, *Chem. Commun.* 2013, **49**, 10127–10129.
- S7 I. D. Brown, *Chem. Rev.*, 2009, **109**, 6858–919.
